# Supplementary material for: Multiple physical crosslinked highly adhesive and conductive hydrogels for human motion and electrophysiological signal monitoring
Source: Royal Society of Chemistry journal article supplement (doi:10.1039/d4sm00195h), 2024-01-01
Supplement: d4sm00195h1.pdf [file d4sm00195h1.pdf]

## Supporting Information

### Multiple Physical Crosslinked Highly Adhesive and Conductive Hydrogel for Human Motion and Electrophysiological Signal Monitoring

*Qirui Wu*<sup>a,b,#</sup>, *Anbang Chen*<sup>b,#</sup>, *Yidan Xu*<sup>c</sup>, *Songjiu Han*<sup>a,b</sup>, *Jiayu Zhang*<sup>b</sup>, *Yujia Chen*<sup>b</sup>,  
*Jianren Hang*<sup>a</sup>, *Xiaoxiang Yang*<sup>a,\*</sup>, *Lunhui Guan*<sup>b,\*</sup>

<sup>a</sup> School of Mechanical Engineering and Automation, Fuzhou University, Fuzhou 350108,  
China

<sup>b</sup> CAS Key Laboratory of Design and Assembly of Functional Nanostructures, Fujian Key  
Laboratory of Nanomaterials, Fujian Institute of Research on the Structure of Matter, Chinese  
Academy of Sciences, Fuzhou 350108, China.

<sup>c</sup> Department of Oncology, The First Affiliated Hospital of Anhui Medical University, Hefei  
230000, China.

#Authors with equal contributions.

\*Corresponding authors.

E-mail addresses: [guanlh@fjirsm.ac.cn](mailto:guanlh@fjirsm.ac.cn)

## Experimental section

### Material

Polyvinyl alcohol (PVA) is supplied by Sinopharm Chemical Reagent Co., Ltd. Acrylamide (AM), acrylic acid (AA), N, N'-Methylenebis (acrylamide) (MBAA) and CaCl<sub>2</sub> were purchased from Aladdin Reagent (Shanghai) Co., Ltd. Fumed SiO<sub>2</sub> and Lithium Phenyl(2,4,6-trimethylbenzo) Phosphinate (LAP) is supplied by Adamas.

### Preparation of ICHgel

0.2gPVA was added to 2ml water, stirred magnetically at 95°C for 30min, then 1g AM was added slowly, 0.1g AA and 2.5mg MBAA were added to the solution after full dissolution, and finally 120mg F-SiO<sub>2</sub> was added to the mixed solution and stirred continuously for 30min to form a uniform solution. Then 10mg LAP was added to the solution, and CaCl<sub>2</sub> with a mass fraction of 20wt% was slowly added to form a precursor solution after stirring. Then the mixed solution is poured into the mold prepared in advance. Finally, the solution is placed under ultraviolet light ( $\lambda=405$  nm wavelength, with an intensity of 8 W) for 10min to form ICHgel

### Characterization and measurements

The infrared spectra were obtained by a Fourier-transform infrared (FT-IR) spectrometer (Vertex 70, Bruker), collecting at wavenumbers ranging from 4000 to 400 cm<sup>-1</sup> at a resolution of 4 cm<sup>-1</sup>. The crystalline properties of the ICHgel were characterized by X-ray diffraction (DY5261/Xpert3, CEM, America) at room temperature and the 2 theta was ranging from 5° to 80°. The conductivity of ions of ICHgel was studied by electrochemical impedance spectroscopy (EIS). The specimens of different components with dimensions of 10 mm × 10 mm × 1 mm were clamped between two nickel mesh electrodes, and the tests were conducted on an electrochemical workstation (CHI760e). The ionic conductivity  $\sigma$  was calculated using the following equation:  $\sigma=L/RA$ . In this formula, L represents the thickness of the sample, R is the bulk resistance obtained from the EIS plot, and A is the area of the sample. The sample is cut into a dumbbell shape and then used to test the mechanical properties. The mechanical performances test was performed on a universal material tester (AG-X plus, SHIMADZU, Japan) with a 100N load cell. To investigate ICHgel's (specimen measuring 40mm× 10mm× 2 mm) response to dynamic signals, we used a digital source meter (Keithley 2450, Tektronix Co., USA). The sensitivity factor (GF) of ICHgel can be calculated by the following formula:  $GF=\Delta R/\epsilon R_0$ . In this formula,  $\Delta R$  represents the relative change in resistance,  $R_0$  is the initial resistance value, and  $\epsilon$  was the strain.

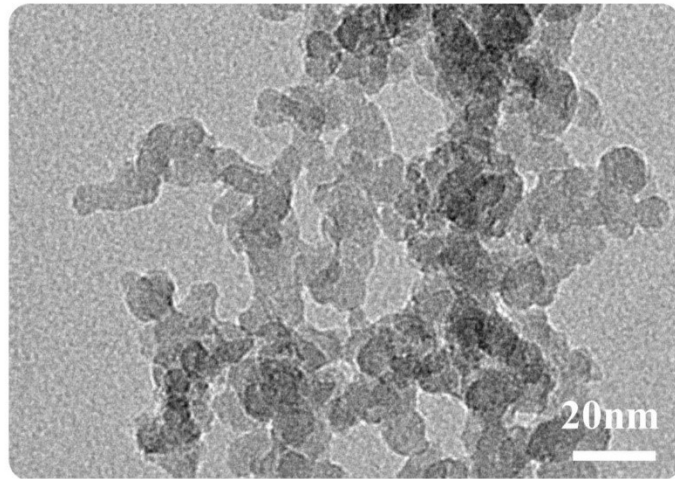

**Figure.S1** TEM image of F-SiO<sub>2</sub> nano-powder.

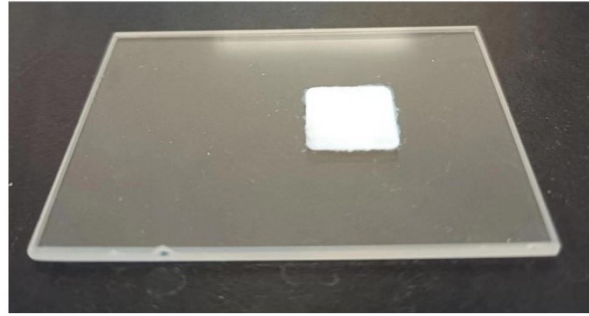

**Figure.S2** Optical image of F-SiO<sub>2</sub> nano-powder.

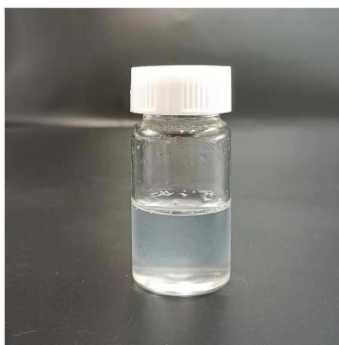

**Figure.S3** Optical image of ICHgel precursor.

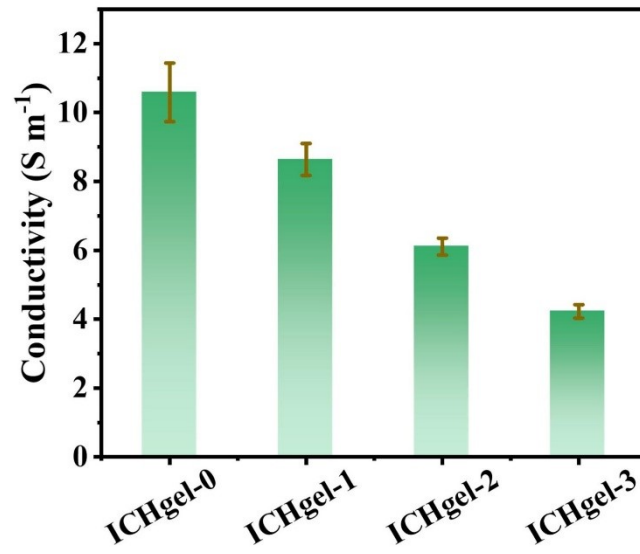

Figure.S4 Conductivity of ICHgel with different F-SiO<sub>2</sub> content.

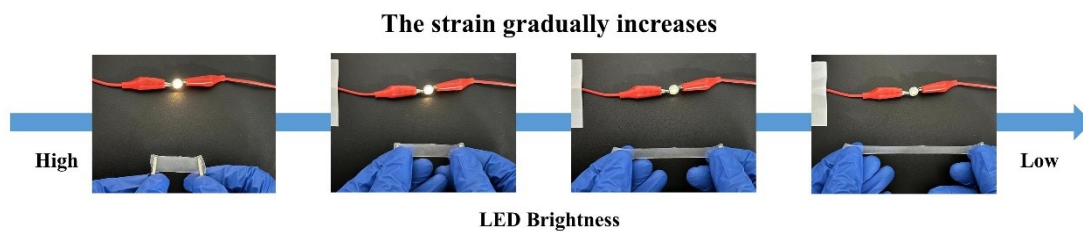

**Figure.S5** ICHgel series LED, and the brightness decreases with the increase of tensile strain

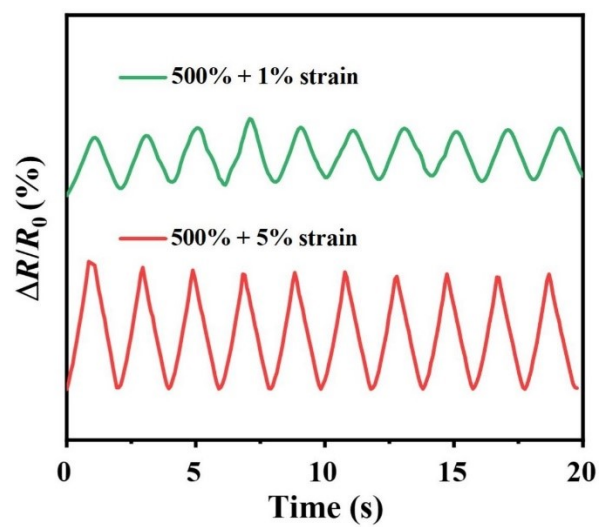

**Figure.S6**  $\Delta R/R_0$  values corresponding to 1% and 5% strains stretched at 500% pre-strain



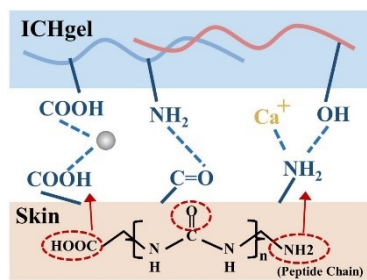

**Figure.S7** Mechanism schematic illustrating the outstanding adhesion between ICHgel and skin.
